# Supplementary material
Source: Springer Nature journal article supplement (https://www.springerprofessional.de/resource/supplementary/13638_2011_92_MOESM7_ESM.pdf/11897424)

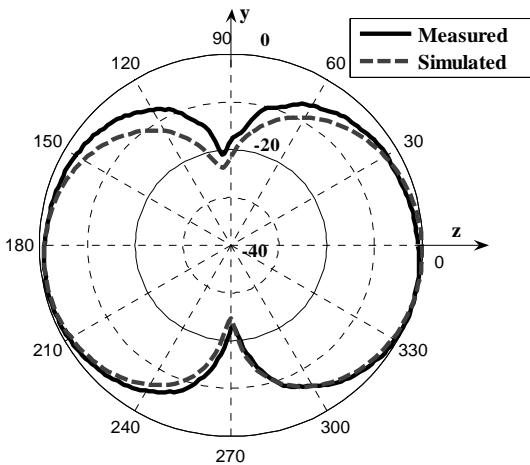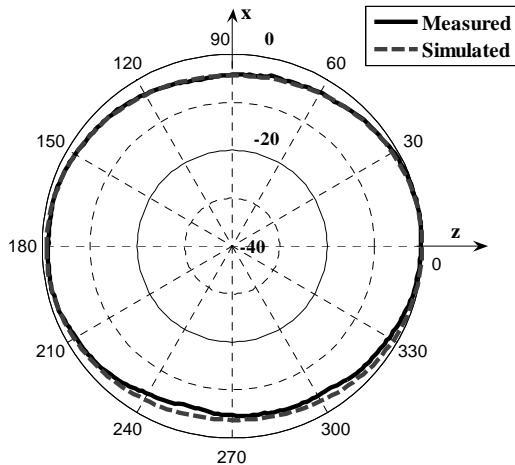

(a)  $f = 3.3$  GHz

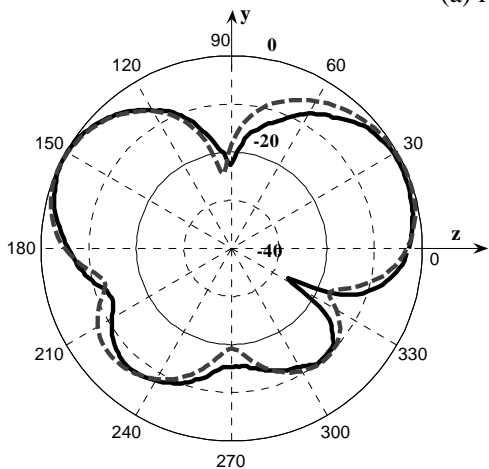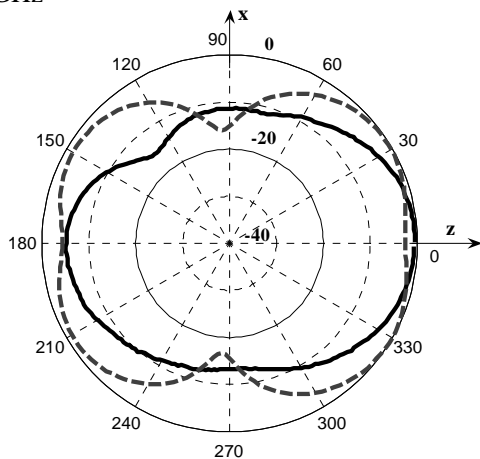

(b)  $f = 7$  GHz

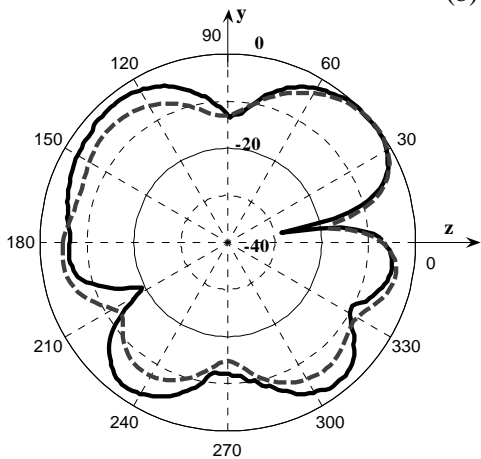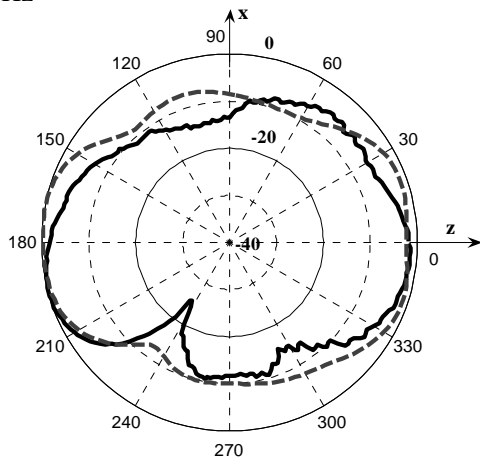

(c)  $f = 10$  GHz

E-Plane (yz-plane)

H-Plane (xz-plane)

Supplement: MOESM7 [file 11897424]
